# Supplementary material for: Horizontal Transfer of miR-643 from Cisplatin-Resistant Cells Confers Chemoresistance to Recipient Drug-Sensitive Cells by Targeting APOL6
Source: MDPI journal article supplement (doi:10.3390/cells10061341), 2021-05-28
Supplement: s1 [file s1]

## SUPPLEMENTARY FILE

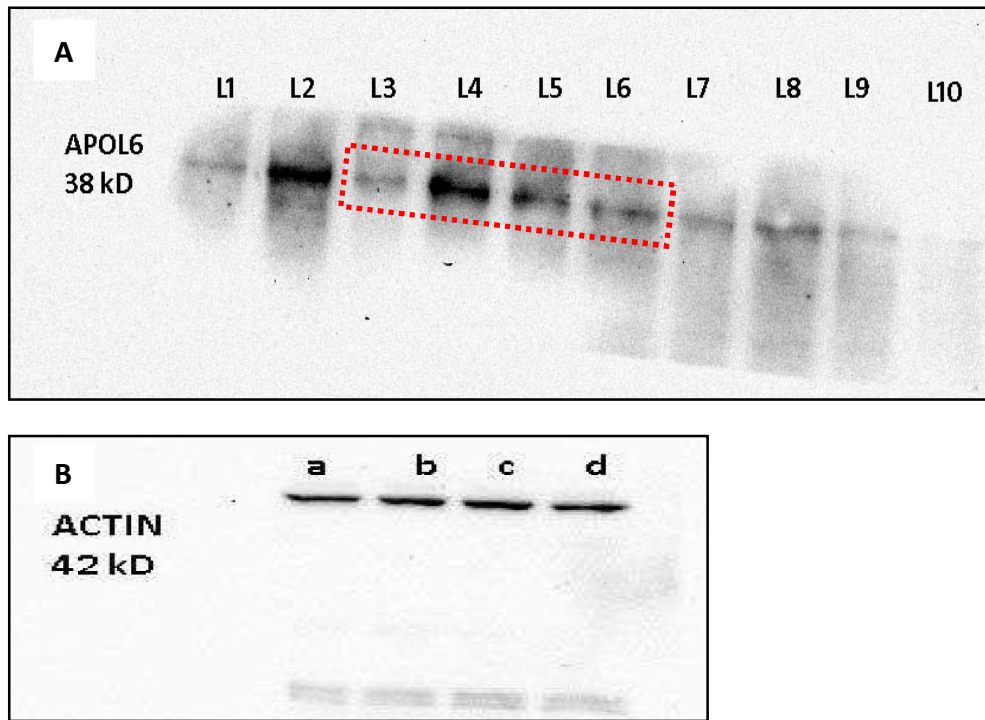

**Figure S1.** Original full-length blots of APOL6 and loading control ACTIN from which Figure 5 E(II) was generated. HeLa cells were treated with EXsen or EXres in presence or absence of cisplatin followed by western blot analysis of the levels of APOL6 and ACTIN. **A.** Levels of APOL6 protein. In **A**, red dashed line box (L3, L4, L5 and L6) corresponds to a, b, c and d of Figure 5E(II) respectively. **B.** Levels of ACTIN protein. In **A** and **B**, a represents untreated cells; b represents cells treated with cisplatin; c represents cells treated with EXsen and cisplatin; d represents cells treated with EXres and cisplatin.

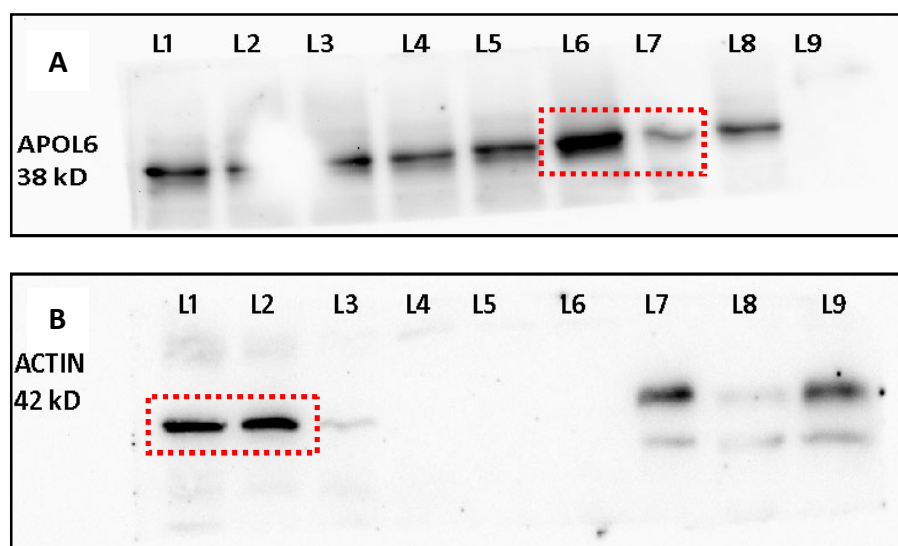

**Figure S2.** Original full length blots of APOL6 and loading control ACTIN from which Figure 6 B(II) was generated. Hela cells were transfected with pCMVmiR (control) or miR-643 construct in presence of cisplatin followed by western blot analysis of the levels of APOL6 and ACTIN. **A.** Levels of APOL6 protein. In **A**, red dashed line boxes (L6 and L7) corresponds to a and b of Figure 6 B(II) respectively **B.** Levels of ACTIN protein. In **B**, red dashed line box (L1 and L2) corresponds to a and b of Figure 6 B(II) respectively. In **A** and **B**, a represents pCMVmiR transfected cells treated with cisplatin; b represents miR-643 overexpressed cells treated with cisplatin.

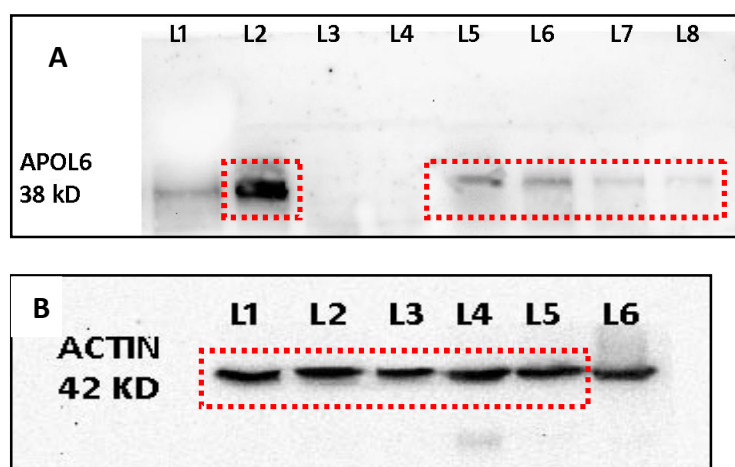

**Figure S3.** Original full length blots of APOL6 and loading control ACTIN from which Figure 6 C(II) was generated. miR-643 overexpressing Hela cells were treated with EXsen/EXres in presence of cisplatin followed by western blot analysis of the levels of APOL6 and ACTIN. **A.** Levels of APOL6 protein. In **A**, red dashed line box (L2, L5, L6, L7 and L8) corresponds to a, b, c, d and e of Figure 6 C(II) respectively. **B.** Levels of ACTIN protein. In **B**, red dashed line box (L1-L5) corresponds to a, b, c, d and e of Figure 6 C(II) respectively. In **A** and **B**, a represents pCMVmiR (vector) transfected cells treated with cisplatin; b represents pCMVmiR (vector) transfected cells treated with EXsen and cisplatin; c represents pCMVmiR (vector) transfected cells treated with EXres and cisplatin; d represents miR-643 overexpressed cells treated with EXsen and cisplatin; e represents miR-643 overexpressed cells treated with EXres and cisplatin.

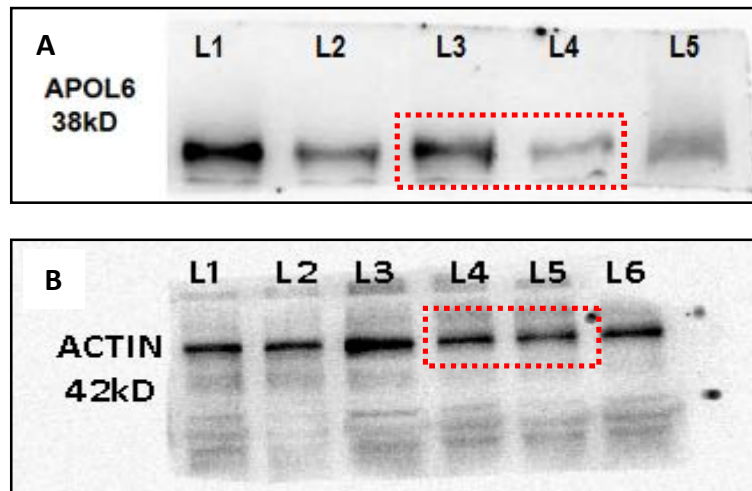

**Figure S4.** Original full length blots of APOL6 and loading control ACTIN from which Figure 8 A(II) was generated. miR-643 overexpressing Hela cells were treated with exosomes isolated from miR-643 overexpressing cells in presence of cisplatin followed by western blot analysis of the levels of APOL6 and ACTIN. **A.** Levels of APOL6 protein. In **A**, red dashed line box (L3 and L4) corresponds to a and b of Figure 8 A(II) respectively. **B.** Levels of ACTIN protein. In **B**, red dashed line box (L4 and L5) corresponds to a and b of Figure 8 A(II) respectively. In A and B, a represents Hela cells treated with  $\text{EXO}_{\text{pCMVmiR}} + \text{cisplatin}$ ; b represents Hela cells treated with  $\text{EXO}_{\text{miR-643}} + \text{cisplatin}$ ;

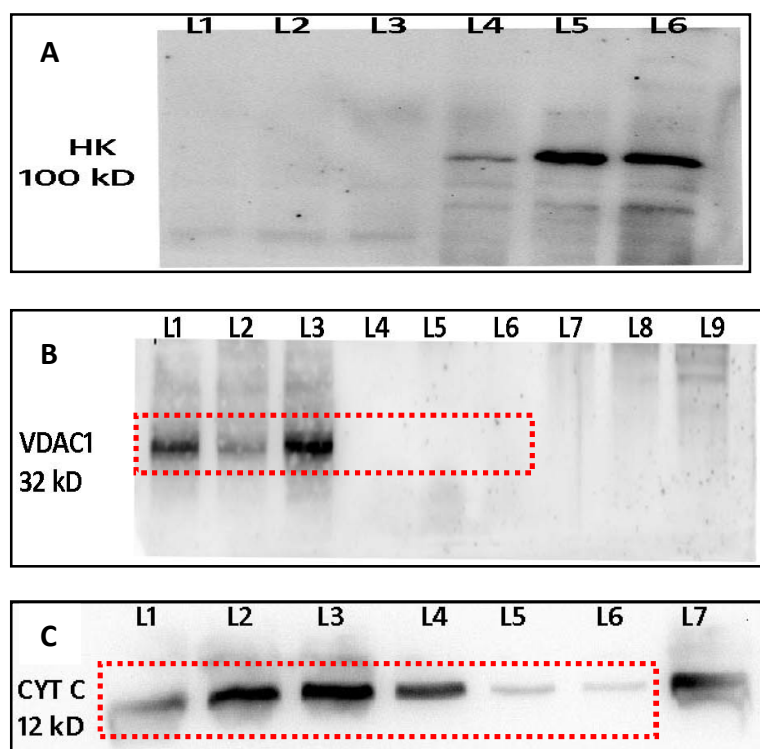

**Figure S5.** Original Full length western blots of APOL6 and loading control ACTIN from which Figure 10 A(I) was generated. Mitochondrial and cytoplasmic fractions extracted from HeLa cells treated with EXsen/EXres and cisplatin followed by western blot analysis of the levels of HK, VDAC1 and CYT C. **A.** Levels of HK protein. In **A**, L1, L2, L3, L4, L5 and L6 corresponds to a, b, c, d, e and f of Figure 10 A(I) respectively. **B.** Levels of VDAC1 protein. In **B**, red dashed line box (L1-L6) corresponds to a, b, c, d, e and f of Figure 10 A(I) respectively. **C.** Levels of CYT C protein. In **C**, red dashed line box (L1-L6) corresponds to a, b, c, d, e and f of Figure 10 A(I) respectively. In **A**, **B** and **C**, a represents mitochondrial fractions of cells treated with cisplatin; b represents mitochondrial fractions of cells treated with EXsen and cisplatin; c represents mitochondrial fractions of cells treated with EXres and cisplatin; d represents cytoplasmic fractions of cells treated with cisplatin; e represents cytoplasmic fractions of cells treated with EXsen and cisplatin; f represents cytoplasmic fractions of cells treated with EXres and cisplatin;

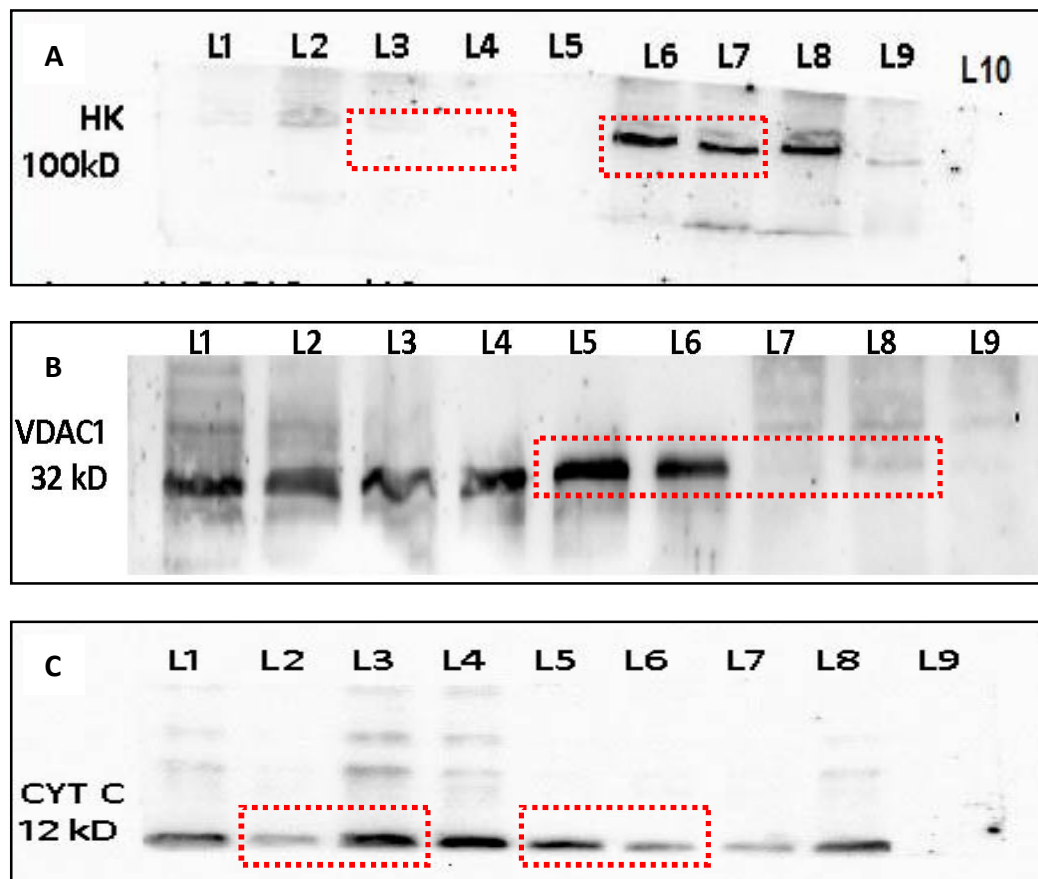

**Figure S6.** Original full length blots of APOL6 and loading control ACTIN from which Figure 10 B(I) was generated. Mitochondrial and cytoplasmic fractions extracted from miR-643 overexpressing HeLa cells treated with cisplatin followed by western blot analysis of the levels of HK, VDAC1 and CYT C. **A.** Levels of HK protein. In **A**, red dashed line box (L3, L4, L6 and L7) corresponds to a, b, c and d of Figure 10 A(I) respectively. **B.** Levels of VDAC1 protein. In **B**, red dashed line box (L5-L8) corresponds to a, b, c and d of Figure 10 A(I) respectively. **C.** Levels of CYT C protein. In **C**, red dashed line box (L2, L3, L5, L6) corresponds to a, b, c and d of Figure 10 A(I) respectively. In **A**, **B** and **C**, a represents mitochondrial fractions of HeLa cells treated with  $\text{EXO}_{\text{pCMVmiR}} + \text{cisplatin}$ ; b represents mitochondrial fractions of HeLa cells treated with  $\text{EXO}_{\text{miR-643}} + \text{cisplatin}$ ; c represents cytoplasmic fractions of HeLa cells treated with  $\text{EXO}_{\text{pCMVmiR}} + \text{cisplatin}$ ; d represents cytoplasmic fractions of HeLa cells treated with  $\text{EXO}_{\text{miR-643}} + \text{cisplatin}$ ;
